# Supplementary material
Source: PubMed Central journal article supplement (PMC3680370)
Supplement: NIHMS396155-supplement-1_si_001.pdf [file NIHMS396155-supplement-1_si_001.pdf]

# Supporting Information

## Design and Synthesis of Neuroprotective Methylthiazoles and Modification as NO-Chimeras for Neurodegenerative Therapy

*Zhihui Qin<sup>†</sup>, Jia Luo<sup>†</sup>, Lawren VandeVrede<sup>†</sup>, Ehsan Tavassoli<sup>†</sup>, Mauro Fa'<sup>‡</sup>, Andrew Teich<sup>‡</sup>,  
Ottavio Arancio<sup>‡</sup> and Gregory R. J. Thatcher<sup>†,\*</sup>*

<sup>†</sup>Department of Medicinal Chemistry and Pharmacognosy, College of Pharmacy, University of  
Illinois at Chicago, 833 S. Wood St., Chicago, IL 60612-7231

<sup>‡</sup>Department of Pathology & Cell Biology, The Taub Institute for Research on Alzheimer's  
Disease and the Aging Brain, Columbia University, P&S #12-420D, 630W 168th St., New York,  
NY 10032

E-mail: [thatcher@uic.edu](mailto:thatcher@uic.edu)

\* To whom correspondence about the manuscript should be sent: Department of Medicinal  
Chemistry and Pharmacognosy, College of Pharmacy, University of Illinois at Chicago (MC  
781), 833 S. Wood St., Chicago, IL 60612-7231. Tel: 312-355-5282. Fax: 312 996 7107.

## Contents

S3 **Figure S1.** Decomposition of **42** (100 $\mu$ M) in phosphate buffer (100 mM, pH 7.4).

S4 **Table S1.** Relative percentage neuroprotection of primary neuronal cultures in response to NMDA neurotoxicity after co-treatment with MZ derivatives.

**Figure S1.** Decomposition of **42** (100 $\mu$ M) in phosphate buffer (100 mM, pH 7.4). Incubation was conducted at room temperature for 48h and analyzed by LC-MS with UV detection at 254nm. Four UV-detectable byproducts including two denitrated products ( $m/z = 333$ ) were observed.

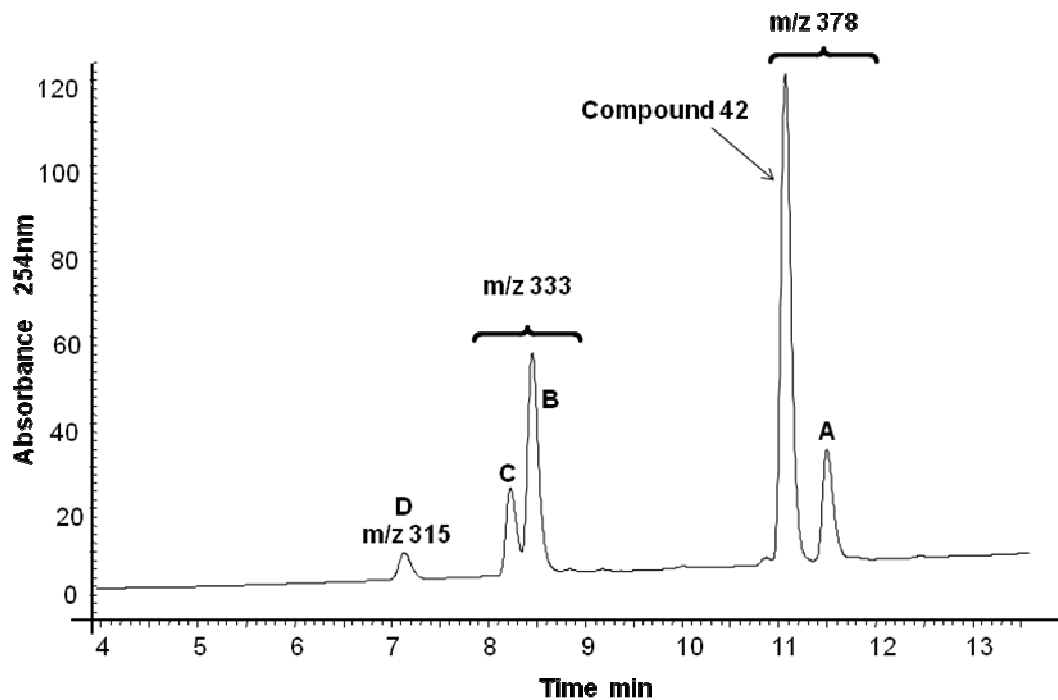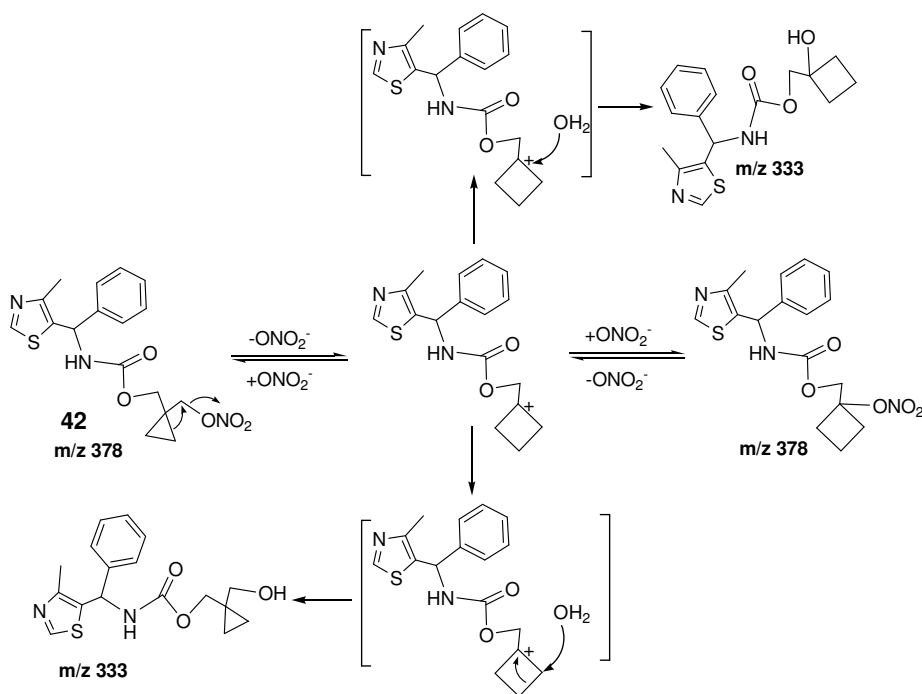

**Table S1.** Relative percentage neuroprotection of primary neuronal cultures in response to NMDA neurotoxicity after co-treatment with MZ derivatives.

|                                                                                                                                                                                                                            | % after NMDA <sup>a</sup> |            | % after NMDA <sup>a</sup> |
|----------------------------------------------------------------------------------------------------------------------------------------------------------------------------------------------------------------------------|---------------------------|------------|---------------------------|
| <b>5a</b>                                                                                                                                                                                                                  | 26.7 ± 8.4                |            |                           |
| <b>CMZ</b>                                                                                                                                                                                                                 | 11.0 ± 5.3                | <b>5b</b>  | 19.1 ± 11.2               |
| <b>10</b>                                                                                                                                                                                                                  | 23.9 ± 11.6               | <b>5d</b>  | 59.0 ± 9.0                |
| <b>22a</b>                                                                                                                                                                                                                 | -0.3 ± 5.8                | <b>5c</b>  | 25.3 ± 11.3               |
| <b>22b</b>                                                                                                                                                                                                                 | 26.1 ± 4.8                | <b>5i</b>  | 12.7 ± 5.3                |
| <b>23a</b>                                                                                                                                                                                                                 | -0.3 ± 5.7                | <b>5e</b>  | 39.6 ± 11.0               |
| <b>23b</b>                                                                                                                                                                                                                 | 21.5 ± 11.6               | <b>5f</b>  | 19.8 ± 9.3                |
| <b>5g</b>                                                                                                                                                                                                                  | 37.1 ± 8.6                |            |                           |
| <b>25</b>                                                                                                                                                                                                                  | 5.9 ± 7.3                 | <b>5h</b>  | 29.5 ± 12.1               |
| <b>8</b>                                                                                                                                                                                                                   | 25.6 ± 9.7                |            |                           |
| <b>16</b>                                                                                                                                                                                                                  | 17.6 ± 8.1                |            |                           |
| <b>6a</b>                                                                                                                                                                                                                  | -34.9 ± 5.1               |            |                           |
| <b>6b</b>                                                                                                                                                                                                                  | 6.7 ± 8.2                 | <b>11a</b> | 0.6 ± 12.4                |
| <b>38</b>                                                                                                                                                                                                                  | 7.4 ± 7.1                 | <b>11b</b> | 64.4 ± 13.4               |
| <b>11c</b>                                                                                                                                                                                                                 | 18.3 ± 4.4                |            |                           |
| <b>26</b>                                                                                                                                                                                                                  | 1.7 ± 4.4                 |            |                           |
| <b>4</b>                                                                                                                                                                                                                   | 21.4 ± 6.4                | <b>30</b>  | 19.6 ± 6.2                |
| <p>a. Readings from MTT assay at 24 h relative to vehicle in absence of NMDA (100% survival) and presence of NMDA (0% survival): % = (Drug-NMDA)/(DMSO-NMDA), NMDA (100 μM). Values are presented as mean ± SEM (n=6).</p> |                           |            |                           |
